# Supplementary material for: The association between role model presence and self-regulation in early adolescence: A cross-sectional study
Source: PubMed Central journal article supplement (PMC6752835; doi:10.1371/journal.pone.0222752), 2019-09-19
Supplement: pone.0222752.s001.pdf [file pone.0222752.s001.pdf]

### 1. Role model presence

あなたが最も尊敬する人は誰ですか？ 一人だけあげてください。

Who is the person you most look up to? Please write only one name of the person.

### 2. Hopefulness in future expectations

あなたは、これからの人生にどのくらい希望をもっていますか？

To what extent do you feel hopeful about the future of your life?

「希望をまったくもっていない」を0点、「希望にみちあふれている」を10点とすると、何点くらいになると思いますか？

Please answer your level of hopefulness between 0 (Not at all) and 10 (extremely).

希望をまったくもっていない  
Not at all

希望にみちあふれている  
Extremely

0 — 1 — 2 — 3 — 4 — 5 — 6 — 7 — 8 — 9 — 10

### 3. Self-regulation

#### 3-1. Attitude toward work

次の3つのうち、お子さんに最も当てはまるのはどれですか。

Which statement in each group best describes this child?

1. とても勤勉である  
A very hard worker
  2. 平均的な勤勉さである  
Average-works moderately well
  3. 勤勉でなく、怠けている  
A poor worker or lazy

#### 3-2. Concentration

次の3つのうち、お子さんに最も当てはまるのはどれですか。

Which statement in each group best describes this child?

1. とても集中力がある  
One with higher power of concentration
  2. 平均的な集中力である  
Average-concentrates moderately well
  3. ほとんど、または、まったく集中力がない  
Little or no power of sustained concentration

### 3-3. Neatness in work

次の3つのうち、お子さんに最も当てはまるものはどれですか。

Which statement in each group best describes this child?

1. とてもまじめでしっかりしている  
Extremely neat and tidy in work
2. 平均的なまじめさで、ある程度しっかりしている  
Average-moderately neat and tidy
3. とてもだらしない  
Very untidy in work

### 3-4. Daydreaming at home

次の3つのうち、お子さんに最も当てはまるものはどれですか。

Which statement in each group best describes this child?

1. ボーッとしていることはない  
Seldom or never daydreams
2. 時々、ボーッとしている  
Sometimes daydreams
3. 度々、ボーッとしている  
Frequently daydreams
